# Supplementary material
Source: publisher site journal article supplement (https://www.dovepress.com/get_supplementary_file.php?f=241640.docx)
Supplement: Supplementary file 1 [file get_supplementary_file.php]

**Supplementary Table 1. Primer sequences.**

| Name |  | Primer sequences |
| --- | --- | --- |
| miR-153-5p | Forward | 5’-TGCATAGTCACAAAAGTGATCCTC-3’ |
| Reverse | 5’-CTCAACTGGTGTCGTGGAGTC-3’ |
| U6 | Forward | 5’-CTCGCTTCGGCAGCACAT-3’ |
| Reverse | 5’-AACGCTTCACGAATTTGCGT-3’ |
| CDK1 | Forward | 5’-AGGGGTTCCTAGTACTGCAATTC-3’ |
| Reverse | 5’-AATCCATGTACTGACCAGGAGG-3’ |
| Actin | Forward | 5’-GTCCACCGCAAATGCTTCTA-3’ |
| Reverse | 5’-TGCTGTCACCTTCACCGTTC-3’ |

**Supplementary Figure 1 Picture of MDA-MB-231/PTX xenograft tumors.** MDA-MB-231/PTX cells were injected subcutaneously into nude mice to form subcutaneous tumors. MDA-MB-231/PTX xenograft tumors in each group was pictured and weighted on day 21.

**
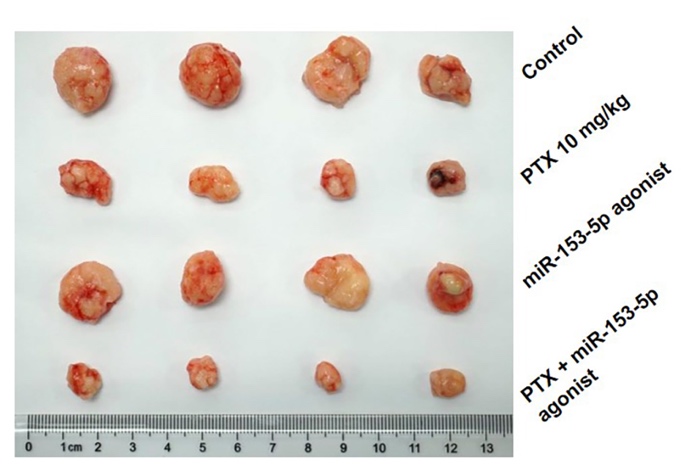
**
